# Supplementary material
Source: publisher figshare collection journal article supplement (https://acs.figshare.com/ndownloader/files/4745677)
Supplement: Supplementary file 1 [file 4745677]

## Supplementary Information

### Schematic of the MOCVD reactor

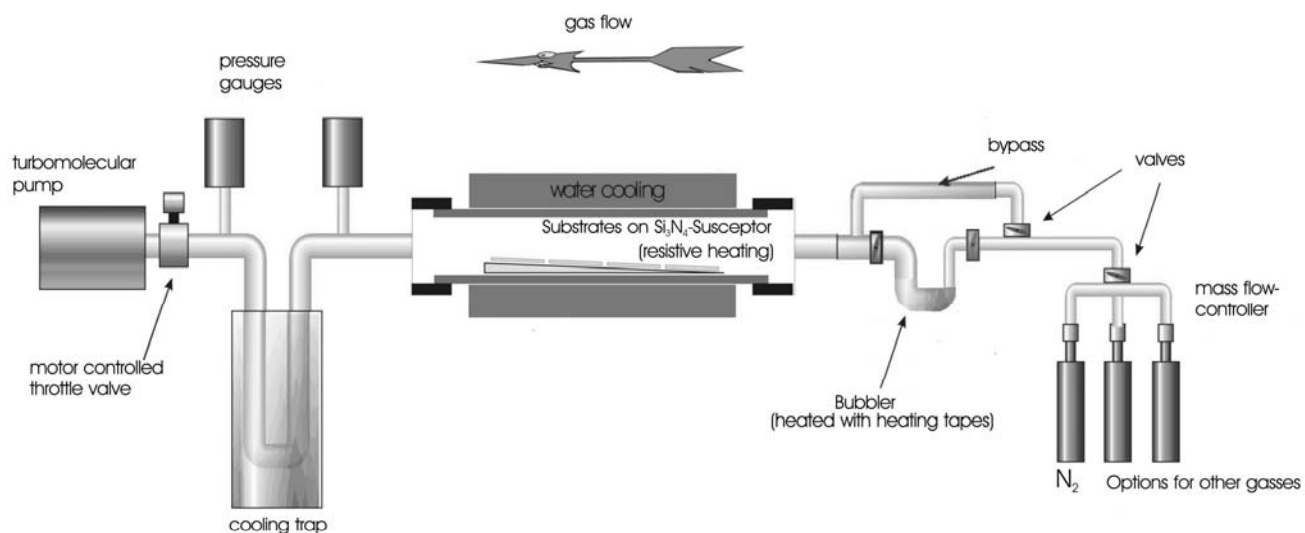

### Cold wall MOCVD reactor schematic

| Film composition from SNMS-Data |                  |               |
|---------------------------------|------------------|---------------|
| Precursor                       | no $\text{NH}_3$ | $\text{NH}_3$ |
| <b>2</b>                        | W = 48 %         | W = 73 %      |
|                                 | N = 2 %          | N = 23 %      |
|                                 | C = 46 %         | C = 1,5 %     |
|                                 | O = 4 %          | O < 1 %       |
| <b>3</b>                        | W = 36 %         | W = 47 %      |
|                                 | N = 3 %          | N = 37 %      |
|                                 | C = 57 %         | C = 11 %      |
|                                 | O = 3 %          | O = 4 %       |
